# Supplementary material for: Unravelling structural insights into ligand-induced photoluminescence mechanisms of sulfur dots
Source: Royal Society of Chemistry journal article supplement (doi:10.1039/d4nr02463j), 2024-01-01
Supplement: d4nr02463j1.pdf [file d4nr02463j1.pdf]

## Electronic Supporting Information

# Unravelling Structural Insights into Ligand-Induced Photoluminescence Mechanisms of Sulfur Dots

Satya Ranjan Sahoo<sup>a,b</sup>, Arun Mukhopadhyay<sup>a,b</sup>, Sukhendu Mahata<sup>a,b</sup>, Komal Kumari<sup>c</sup>, N. V. S. Praneeth<sup>e</sup>, Ananya Baksi<sup>d</sup>, Saumyakanti Khatua<sup>e</sup>, Sumit Saha<sup>a,b</sup>, Surajit Rakshit<sup>c</sup>, and Nirmal Goswami<sup>\*a,b</sup>

<sup>a</sup>Materials Chemistry Department, CSIR-Institute of Minerals and Materials Technology, Bhubaneswar 751013, Odisha, India

<sup>b</sup>Academy of Scientific and Innovative Research (AcSIR), Ghaziabad 201002, Uttar Pradesh, India.

<sup>c</sup>Department of Chemistry, Institute of Science, Banaras Hindu University, Varanasi 221005, Uttar Pradesh, India

<sup>d</sup>Department of Chemistry, Jadavpur University, Kolkata 700032, West Bengal, India

<sup>e</sup>Department of Chemistry, Indian Institute of Technology-Gandhinagar, Palaj 382355, Gujarat, India.

\*Corresponding Author's Email: [ngoswami@immt.res.in](mailto:ngoswami@immt.res.in)

## TABLE OF CONTENT

| Name              | Description                                                                                                                                                                                                                                                                                                                                                                       | Page No. |
|-------------------|-----------------------------------------------------------------------------------------------------------------------------------------------------------------------------------------------------------------------------------------------------------------------------------------------------------------------------------------------------------------------------------|----------|
| <b>Figure S1.</b> | UV-vis spectra of (a) S-QD and (b) S-QD_4%. Excitation-dependent PL Spectra of (c) S-QD and (d) S-QD_4%. Inset: Photographs of S-QD and S-QD_4% respectively in visible and UV light (365 nm).                                                                                                                                                                                    | 5        |
| <b>Figure S2.</b> | UV-vis spectra of (a) S-QD@EG, (b) S-QD@EG_0.75%, and (c) S-QD@EG_4%. Excitation-dependent PL Spectra of (d) S-QD@EG, (e) S-QD@EG_0.75%, and (f) S-QD@EG_4%. Inset: Photographs of S-QD@EG, S-QD@EG_0.75%, and S-QD@EG_4% respectively in visible and UV light (365 nm).                                                                                                          | 5        |
| <b>Figure S3.</b> | UV-vis spectra of (a) S-QD@Gly, (b) S-QD@Gly_0.75%, and (c) S-QD@Gly_4%. Excitation-dependent PL Spectra of (d) S-QD@Gly, (e) S-QD@Gly_0.75%, and (f) S-QD@Gly_4%. Inset: Photographs of S-QD@Gly, S-QD@Gly_0.75%, and S-QD@Gly_4% respectively in visible and UV light (365 nm).                                                                                                 | 6        |
| <b>Figure S4.</b> | UV-vis spectra of (a) S-QD@TA, (b) S-QD@TA_0.75%, and (c) S-QD@TA_4%. Excitation-dependent PL Spectra of (d) S-QD@TA, (e) S-QD@TA_0.75%, and (f) S-QD@TA_4%. Inset: Photographs of S-QD@TA, S-QD@TA_0.75%, and S-QD@TA_4% respectively in visible and UV light (365 nm).                                                                                                          | 6-7      |
| <b>Figure S5.</b> | UV-vis spectra of (a) S-QD@MHA, (b) S-QD@MHA_0.75%, and (c) S-QD@MHA_4%. Excitation-dependent PL Spectra of (d) S-QD@MHA, (e) S-QD@MHA_0.75%, and (f) S-QD@MHA_4%. Inset: Photographs of S-QD@MHA, S-QD@MHA_0.75%, and S-QD@MHA_4% respectively in visible and UV light (365 nm).                                                                                                 | 7        |
| <b>Figure S6.</b> | UV-vis spectra of (a) S-QD@MSA, (b) S-QD@MSA_0.75%, and (c) S-QD@MSA_4%. Excitation-dependent PL Spectra of (d) S-QD@MSA, (e) S-QD@MSA_0.75%, and (f) S-QD@MSA_4%. Inset: Photographs of S-QD@MSA, S-QD@MSA_0.75%, and S-QD@MSA_4% respectively in visible and UV light (365 nm).                                                                                                 | 8        |
| <b>Figure S7.</b> | UV-vis (black solid line), PL emission spectra (blue solid line), and excitation spectra (red dash line) of (a) S-QD@GSH_0%, (c) S-QD@GSH_Green and (d) S-QD@GSH_Blue. Inset: Photographs of S-QD@GSH, S-QD@GSH_Green, and S-QD@GSH_Blue respectively in visible and UV light (365 nm). Excitation-dependent PL Spectra of (d) S-QD@GSH, (e) S-QD@GSH_0.75%, and (f) S-QD@GSH_4%. | 8-9      |
| <b>Figure S8.</b> | UV-vis spectra of (a) S-QD@BA, (b) S-QD@BA_0.75%, and (c) S-QD@BA_4%. Excitation-dependent PL Spectra of (d) S-QD@BA, (e) S-QD@BA_0.75%, and (f) S-QD@BA_4%. Inset: Photographs of S-QD@BA, S-QD@BA_0.75%, and S-QD@BA_4% respectively in visible and UV light (365 nm).                                                                                                          | 9        |
| <b>Figure S9.</b> | UV-vis spectra of (a) S-QD@ABA, (b) S-QD@ABA_0.75%, and (c) S-QD@ABA_4%. Excitation-dependent PL Spectra of (d) S-QD@ABA, (e) S-QD@ABA_0.75%, and (f) S-QD@ABA_4%. Inset: Photographs of S-QD@ABA, S-QD@ABA_0.75%, and S-QD@ABA_4% respectively in visible and UV light (365 nm).                                                                                                 | 10       |
| <b>Figure</b>     | UV-vis spectra of (a) S-QD@HBA, (b) S-QD@HBA_0.75%, and (c) S-                                                                                                                                                                                                                                                                                                                    | 10-11    |

|                    |                                                                                                                                                                                                                                                                                                                                                                                   |       |
|--------------------|-----------------------------------------------------------------------------------------------------------------------------------------------------------------------------------------------------------------------------------------------------------------------------------------------------------------------------------------------------------------------------------|-------|
| <b>S10.</b>        | QD@HBA_4%. Excitation-dependent PL Spectra of (d) S-QD@HBA, (e) S-QD@HBA_0.75%, and (f) S-QD@HBA_4%. Inset: Photographs of S-QD@HBA, S-QD@HBA_0.75%, and S-QD@HBA_4% respectively in visible and UV light (365 nm).                                                                                                                                                               |       |
| <b>Figure S11.</b> | PL spectra of (a) S-QD@MBA_Green (grey line), S-QD@GSH_Green (red line), and S-QD@PEG_Green (blue line). (b) S-QD@MBA_Blue (grey line), S-QD@GSH_Blue (red line), and S-QD@PEG_Blue (blue line).                                                                                                                                                                                  | 11    |
| <b>Figure S12.</b> | UV-vis (black solid line), PL emission spectra (blue solid line), and excitation spectra (red dash line) of (a) S-QD@PEG_0%, (c) S-QD@PEG_Green and (d) S-QD@PEG_Blue. Inset: Photographs of S-QD@PEG, S-QD@PEG_Green, and S-QD@PEG_Blue respectively in visible and UV light (365 nm). Excitation-dependent PL Spectra of (d) S-QD@PEG, (e) S-QD@PEG_0.75%, and (f) S-QD@PEG_4%. | 11    |
| <b>Figure S13.</b> | Excitation-dependent PL Spectra of (a) S-QD@MBA, (b) S-QD@MBA_Green, and (c) S-QD@MBA_Blue.                                                                                                                                                                                                                                                                                       | 12    |
| <b>Figure S14.</b> | 3D PL excitation(y-axis) emission(x-axis) intensity spectra of (a) S-QD@GSH, (b) S-QD@GSH_Green, and (c) S-QD@GSH_Blue.                                                                                                                                                                                                                                                           | 12    |
| <b>Figure S15.</b> | HRTEM image showing (a) d-spacing and (b) SAED pattern of S-QD@MBA_Blue.                                                                                                                                                                                                                                                                                                          | 12    |
| <b>Figure S16.</b> | XPS Survey spectra of (a) S-QD@MBA_Green and (b) S-QD@MBA_Blue.                                                                                                                                                                                                                                                                                                                   | 13    |
| <b>Figure S17.</b> | Plots of PL intensity of (a) Quinine (referenced dye), (b) S-QD@MBA_Blue, and (c) S-QD@GSH_Blue as a function of optical absorbance at 346 nm.                                                                                                                                                                                                                                    | 13    |
| <b>Table S1.</b>   | PL QY calculation S-QD@MBA_Blue and S-QD@GSH_Blue.                                                                                                                                                                                                                                                                                                                                | 13    |
| <b>Table S2.</b>   | PL lifetimes obtained from exponential fittings of experimental PL decays detected at different wavelengths for S-QD@MBA_Green and S-QD@MBA_Blue.                                                                                                                                                                                                                                 | 14    |
| <b>Figure S18.</b> | UV-vis spectra of (a) MBA and (b) MBA_4%. PL spectra of (c) MBA (d) MBA_4% at different excitation wavelengths.                                                                                                                                                                                                                                                                   | 15    |
| <b>Figure S19.</b> | PL spectra of (a) GSH (b) GSH_4% (c) PEG (d) PEG_4% at different excitation wavelengths.                                                                                                                                                                                                                                                                                          | 15-16 |
| <b>Figure S20.</b> | ESI MS of S6 series compared with their theoretically calculated isotope patterns of respective species.                                                                                                                                                                                                                                                                          | 16    |
| <b>Figure S21.</b> | ESI MS of S4 series compared with their theoretically calculated isotope patterns of respective species.                                                                                                                                                                                                                                                                          | 16    |
| <b>Figure S22.</b> | Concentration-dependent normalized PL excitation and emission spectra of (a) S-QD@GSH_Green and (b) S-QD@MBA_Green.                                                                                                                                                                                                                                                               | 17    |
| <b>Figure S23.</b> | PL excitation and emission spectra of S-QD@MBA at 4% and 8% of H2O2 concentration.                                                                                                                                                                                                                                                                                                | 17    |
| <b>Figure S24.</b> | PL Spectra of (a) S-QD@MBA_Blue and (b) S-QD@GSH_Blue after treating with 80% ethanol.                                                                                                                                                                                                                                                                                            | 18    |
| <b>Figure S25.</b> | FTIR spectra of solid precipitate obtained after adding ethanol to S-QD@MBA_Blue (red line) and S-QD (grey line) and compared with MBA ligand (blue line).                                                                                                                                                                                                                        | 18    |

|                    |                                                                                                           |    |
|--------------------|-----------------------------------------------------------------------------------------------------------|----|
| <b>Figure S26.</b> | PL Spectra of Naked S-QD (red solid line) and naked S-QD + Phenyl Sulfonic Acid (50mM) (blue solid line). | 19 |
|--------------------|-----------------------------------------------------------------------------------------------------------|----|

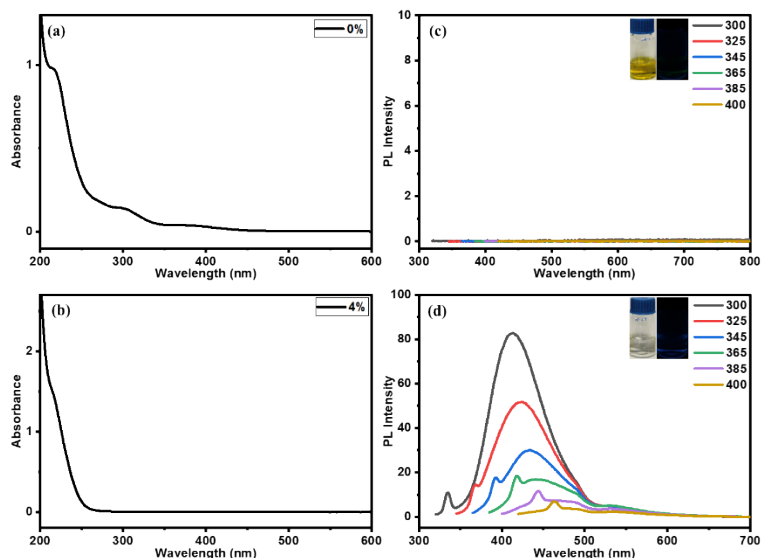

**Figure S1.** UV-vis spectra of (a) S-QD and (b) S-QD\_4%. Excitation-dependent PL Spectra of (c) S-QD and (d) S-QD\_4%. Inset: Photographs of S-QD and S-QD\_4% respectively in visible and UV light (365 nm).

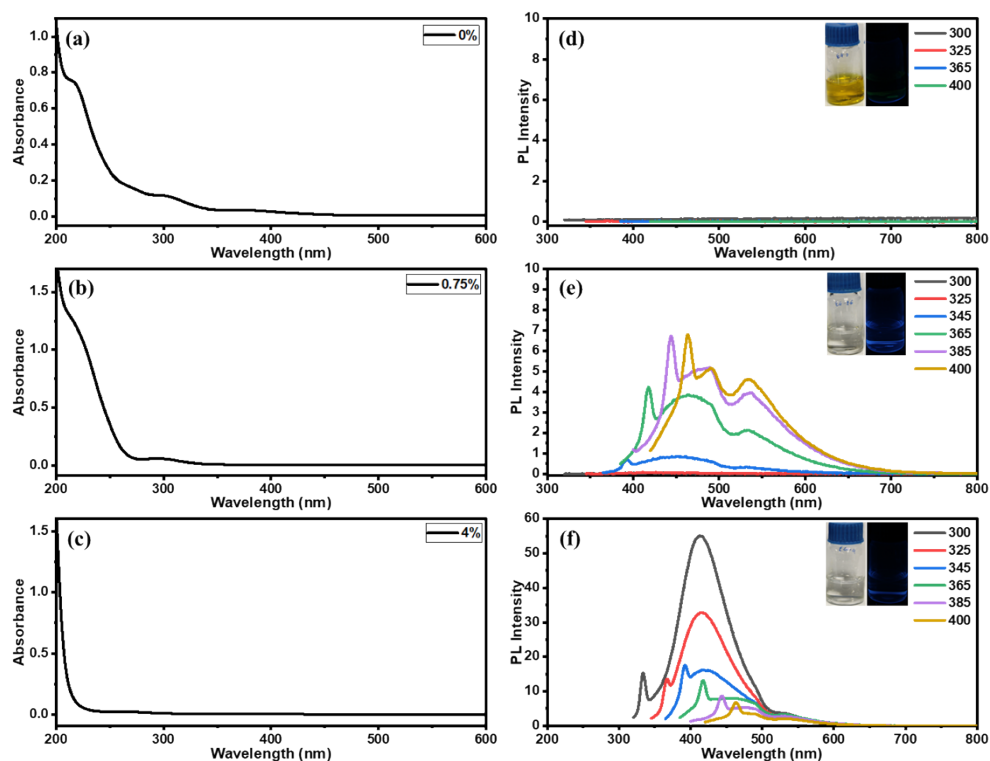

**Figure S2.** UV-vis spectra of (a) S-QD@EG, (b) S-QD@EG\_0.75%, and (c) S-QD@EG\_4%. Excitation-dependent PL Spectra of (d) S-QD@EG, (e) S-QD@EG\_0.75%, and (f) S-QD@EG\_4%. Inset: Photographs of S-QD@EG, S-QD@EG\_0.75%, and S-QD@EG\_4% respectively in visible and UV light (365 nm).

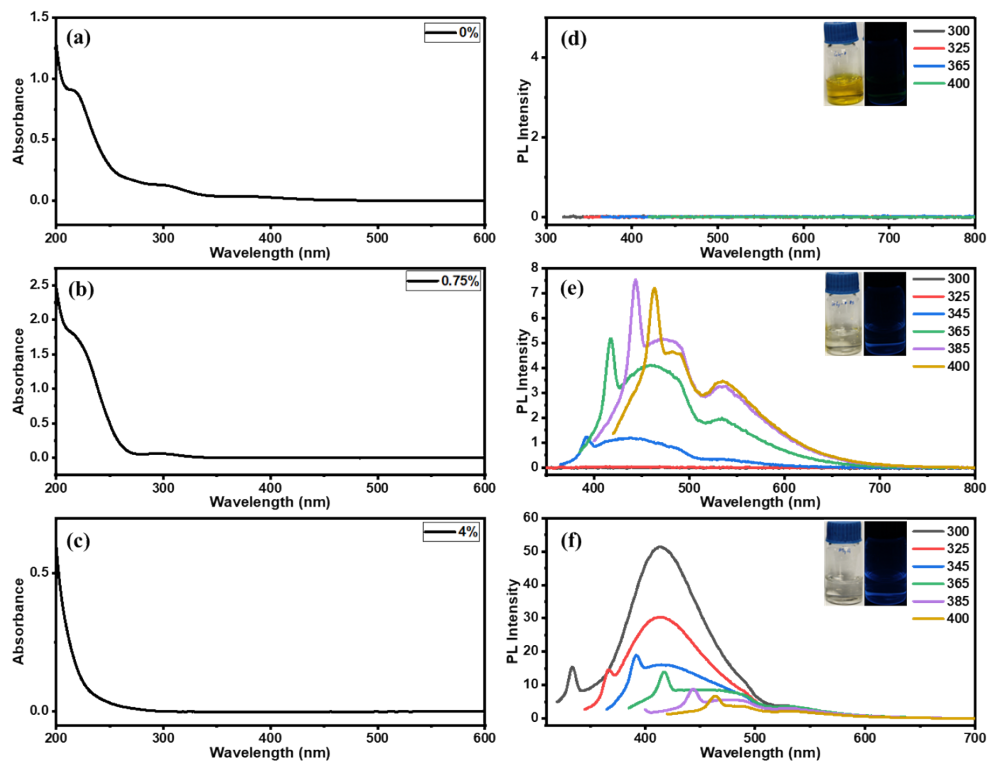

**Figure S3.** UV-vis spectra of (a) S-QD@Gly, (b) S-QD@Gly\_0.75%, and (c) S-QD@Gly\_4%. Excitation-dependent PL Spectra of (d) S-QD@Gly, (e) S-QD@Gly\_0.75%, and (f) S-QD@Gly\_4%. Inset: Photographs of S-QD@Gly, S-QD@Gly\_0.75%, and S-QD@Gly\_4% respectively in visible and UV light (365 nm).

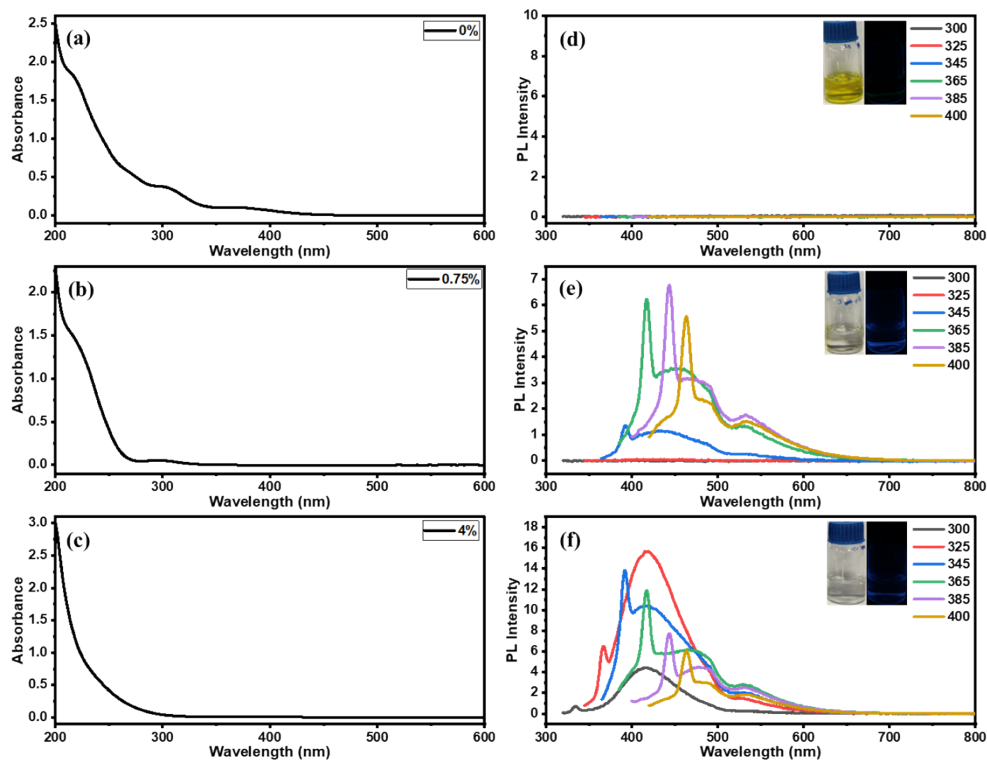

**Figure S4.** UV-vis spectra of (a) S-QD@TA, (b) S-QD@TA\_0.75%, and (c) S-QD@TA\_4%. Excitation-dependent PL Spectra of (d) S-QD@TA, (e) S-QD@TA\_0.75%, and (f) S-QD@TA\_4%. Inset: Photographs of S-QD@TA, S-QD@TA\_0.75%, and S-QD@TA\_4% respectively in visible and UV light (365 nm).

Photographs of S-QD@TA, S-QD@TA\_0.75%, and S-QD@TA\_4% respectively in visible and UV light (365 nm).

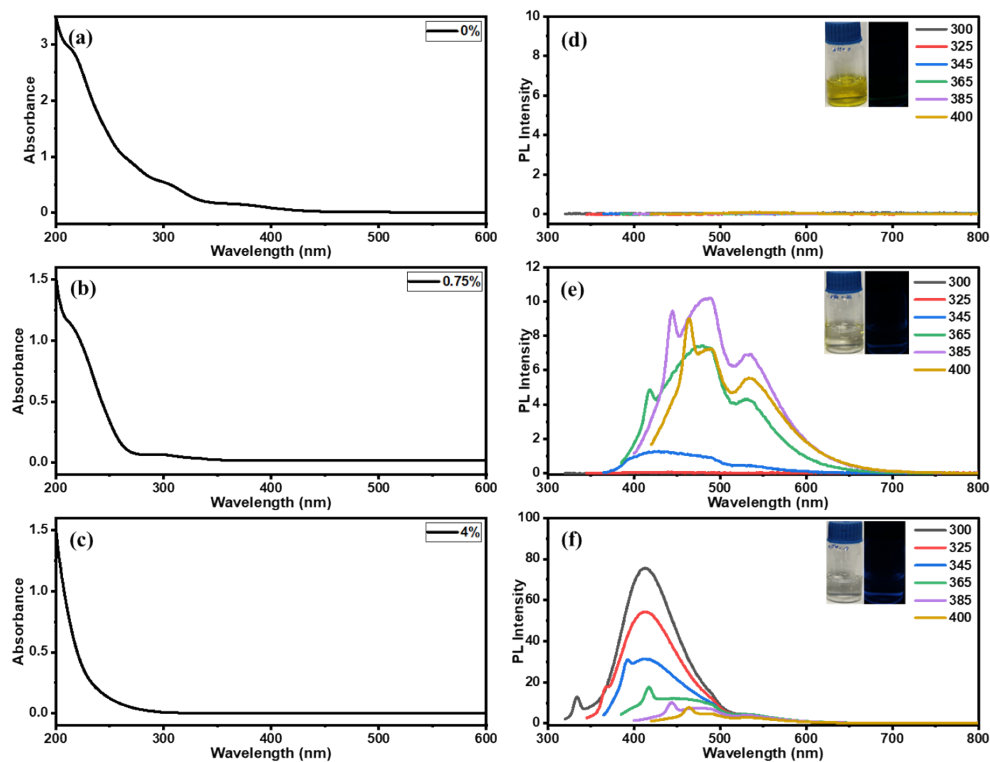

**Figure S5.** UV-vis spectra of (a) S-QD@MHA, (b) S-QD@MHA\_0.75%, and (c) S-QD@MHA\_4%. Excitation-dependent PL Spectra of (d) S-QD@MHA, (e) S-QD@MHA\_0.75%, and (f) S-QD@MHA\_4%. Inset: Photographs of S-QD@MHA, S-QD@MHA\_0.75%, and S-QD@MHA\_4% respectively in visible and UV light (365 nm).

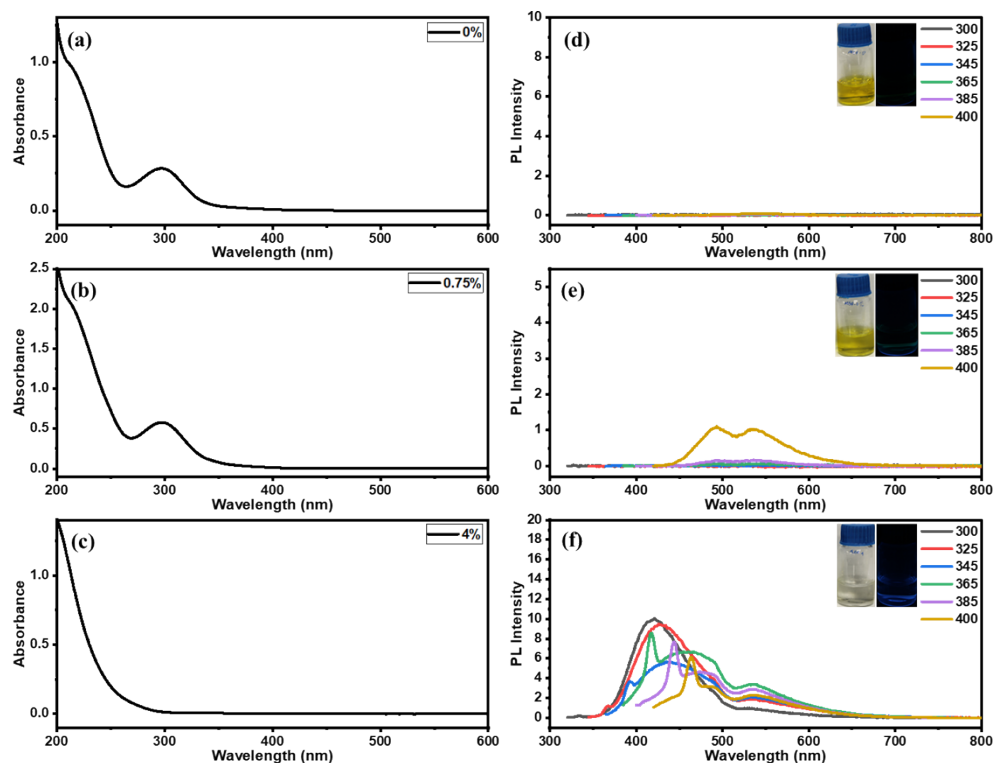

**Figure S6.** UV-vis spectra of **(a)** S-QD@MSA, **(b)** S-QD@MSA\_0.75%, and **(c)** S-QD@MSA\_4%. Excitation-dependent PL Spectra of **(d)** S-QD@MSA, **(e)** S-QD@MSA\_0.75%, and **(f)** S-QD@MSA\_4%. Inset: Photographs of S-QD@MSA, S-QD@MSA\_0.75%, and S-QD@MSA\_4% respectively in visible and UV light (365nm).

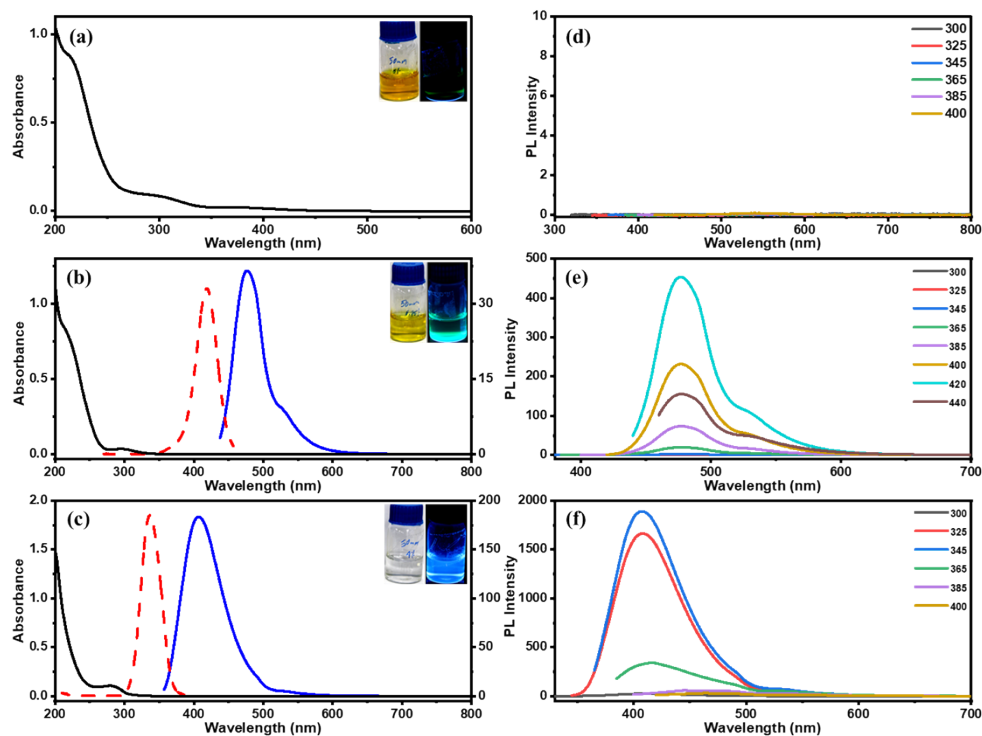

**Figure S7.** UV-vis (black solid line), PL emission spectra (blue solid line), and excitation spectra (red dash line) of **(a)** S-QD@GSH\_0%, **(b)** S-QD@GSH\_Green and **(c)** S-QD@GSH\_Blue. Inset: Photographs of S-QD@GSH, S-QD@GSH\_Green, and S-QD@GSH\_Blue respectively in visible and UV light (365 nm). Excitation-dependent PL Spectra of **(d)** S-QD@GSH, **(e)** S-QD@GSH\_0.75%, and **(f)** S-QD@GSH\_4%.

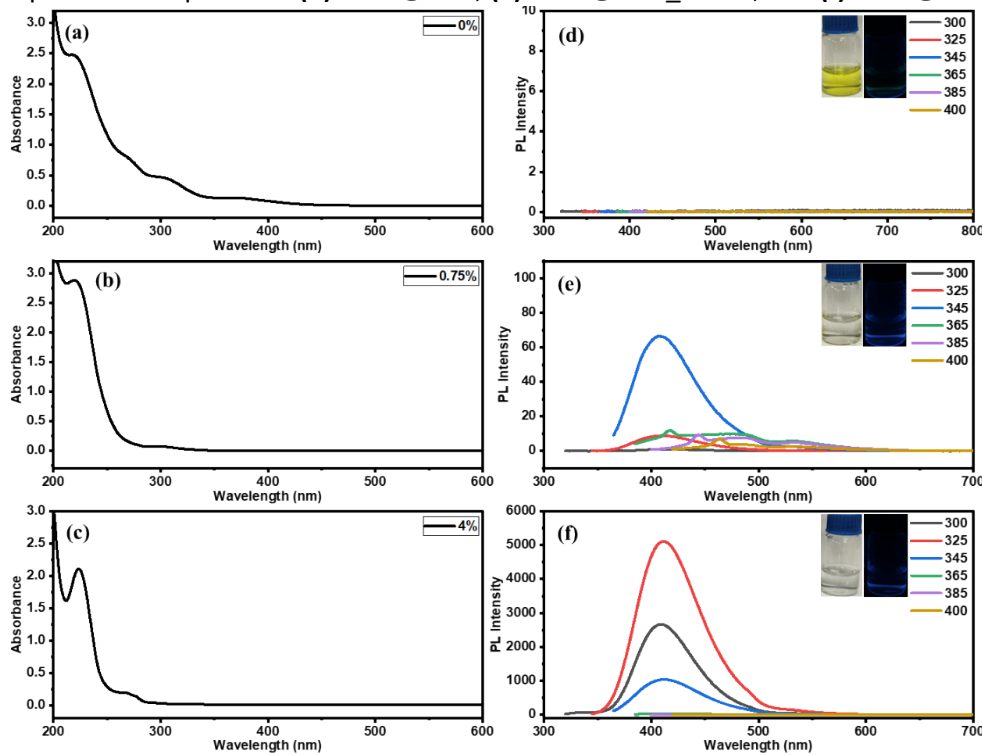



**Figure S8.** UV-vis spectra of **(a)** S-QD@BA, **(b)** S-QD@BA\_0.75%, and **(c)** S-QD@BA\_4%. Excitation-dependent PL Spectra of **(d)** S-QD@BA, **(e)** S-QD@BA\_0.75%, and **(f)** S-QD@BA\_4%. Inset: Photographs of S-QD@BA, S-QD@BA\_0.75%, and S-QD@BA\_4% respectively in visible and UV light (365 nm).

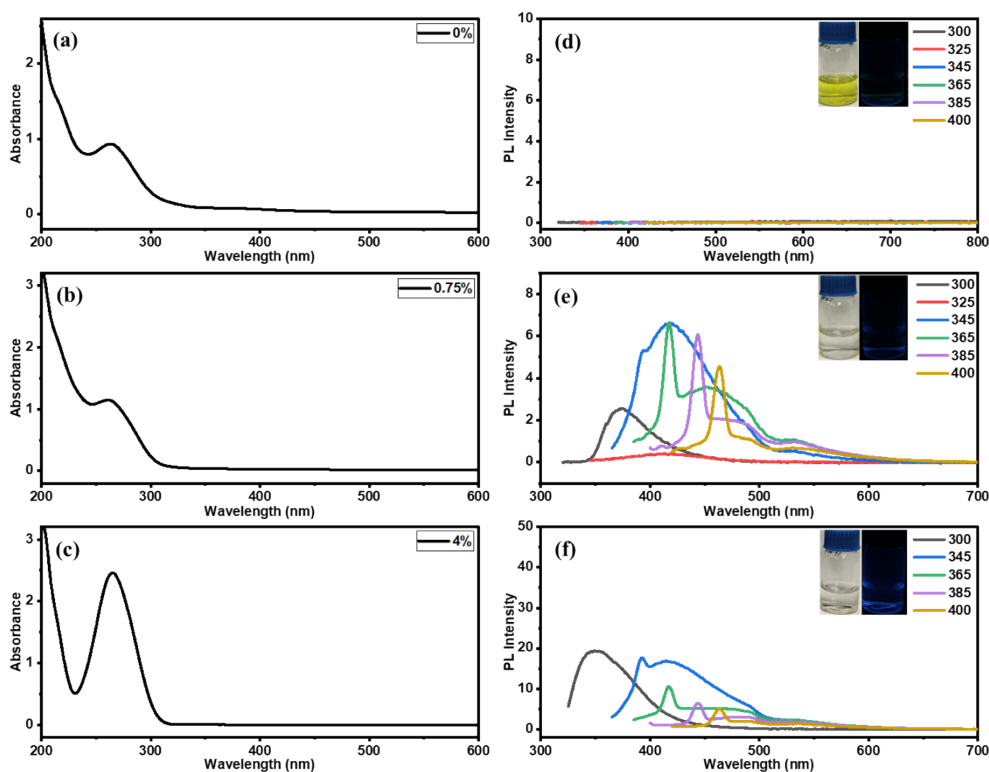

**Figure S9.** UV-vis spectra of **(a)** S-QD@ABA, **(b)** S-QD@ABA\_0.75%, and **(c)** S-QD@ABA\_4%. Excitation-dependent PL Spectra of **(d)** S-QD@ABA, **(e)** S-QD@ABA\_0.75%, and **(f)** S-QD@ABA\_4%. Inset: Photographs of S-QD@ABA, S-QD@ABA\_0.75%, and S-QD@ABA\_4% respectively in visible and UV light (365 nm).

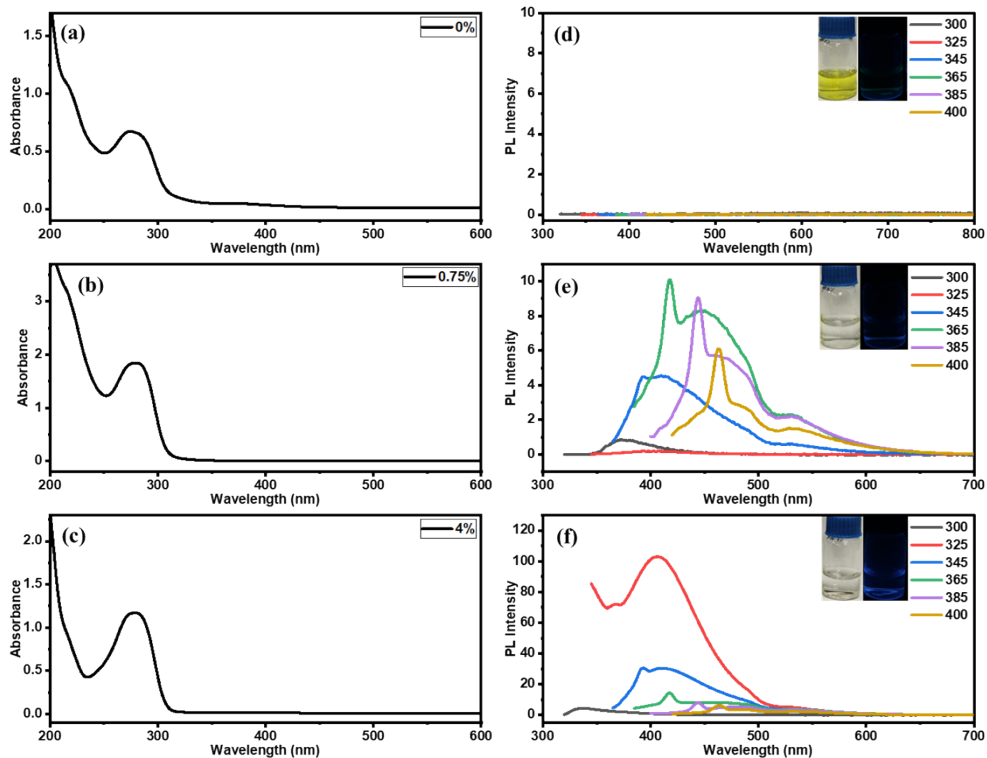

**Figure S10.** UV-vis spectra of **(a)** S-QD@HBA, **(b)** S-QD@HBA\_0.75%, and **(c)** S-QD@HBA\_4%. Excitation-dependent PL Spectra of **(d)** S-QD@HBA, **(e)** S-QD@HBA\_0.75%, and **(f)** S-QD@HBA\_4%. Inset: Photographs of S-QD@HBA, S-QD@HBA\_0.75%, and S-QD@HBA\_4% respectively in visible and UV light (365 nm).

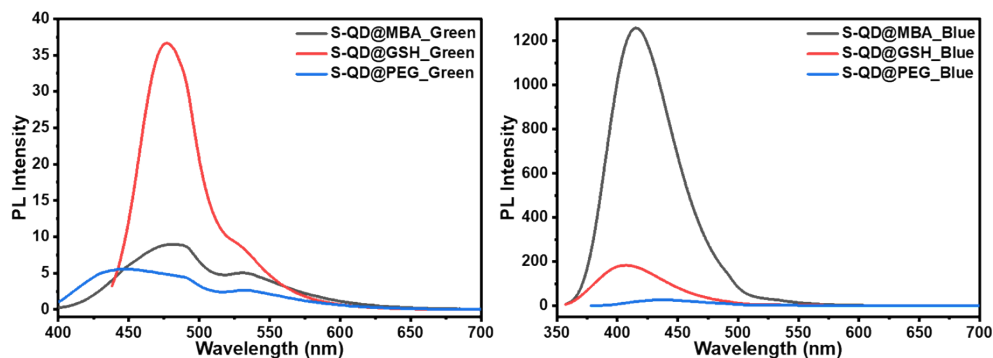

**Figure S11.** PL spectra of **(a)** S-QD@MBA\_Green (grey line), S-QD@GSH\_Green (red line), and S-QD@PEG\_Green (blue line). **(b)** S-QD@MBA\_Blue (grey line), S-QD@GSH\_Blue (red line), and S-QD@PEG\_Blue (blue line).

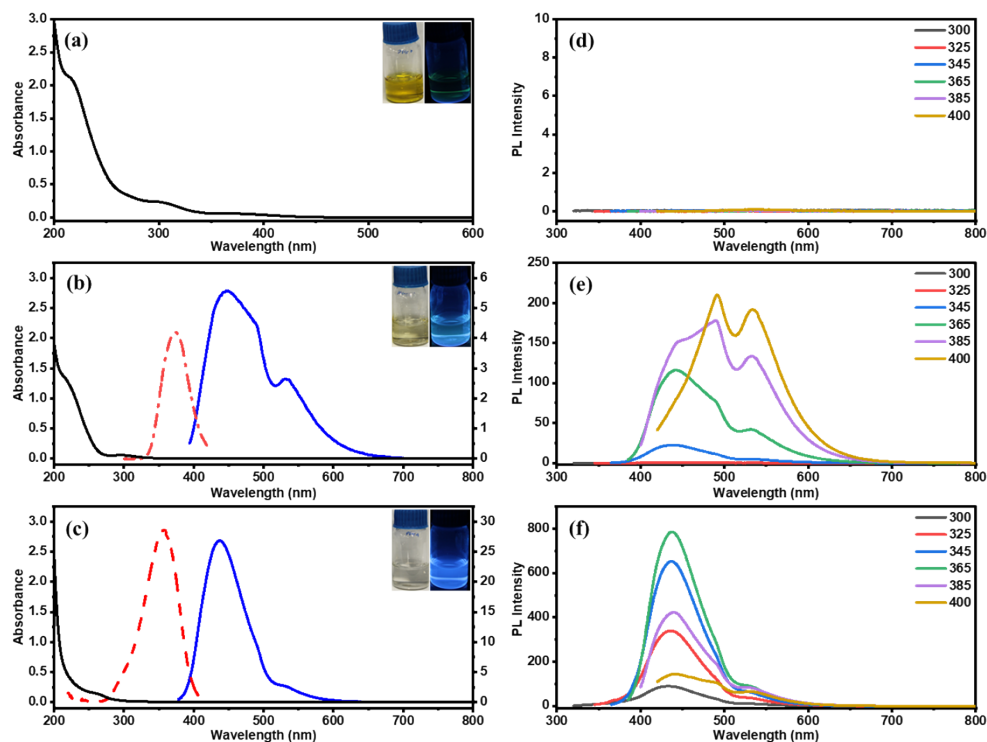

**Figure S12.** UV-vis (black solid line), PL emission spectra (blue solid line), and excitation spectra (red dash line) of **(a)** S-QD@PEG\_0%, **(b)** S-QD@PEG\_Green and **(c)** S-QD@PEG\_Blue. Inset: Photographs of S-QD@PEG, S-QD@PEG\_Green, and S-QD@PEG\_Blue respectively in visible and UV light (365 nm). Excitation-dependent PL Spectra of **(d)** S-QD@PEG, **(e)** S-QD@PEG\_0.75%, and **(f)** S-QD@PEG\_4%.

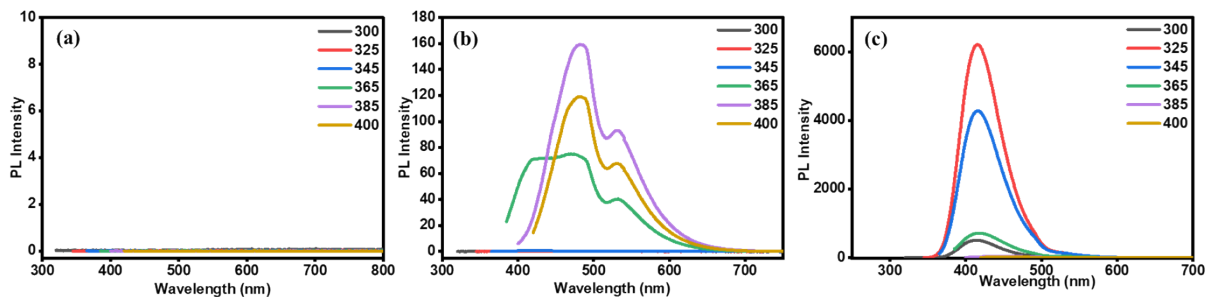

**Figure S13.** Excitation-dependent PL Spectra of **(a)** S-QD@MBA, **(b)** S-QD@MBA\_Green, and **(c)** S-QD@MBA\_Blue.

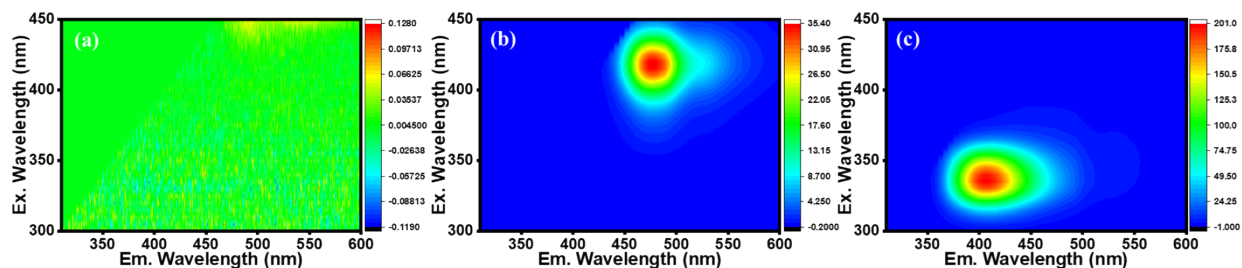

**Figure S14.** 3D PL excitation(y-axis) emission(x-axis) intensity spectra of **(a)** S-QD@GSH, **(b)** S-QD@GSH\_Green, and **(c)** S-QD@GSH\_Blue.

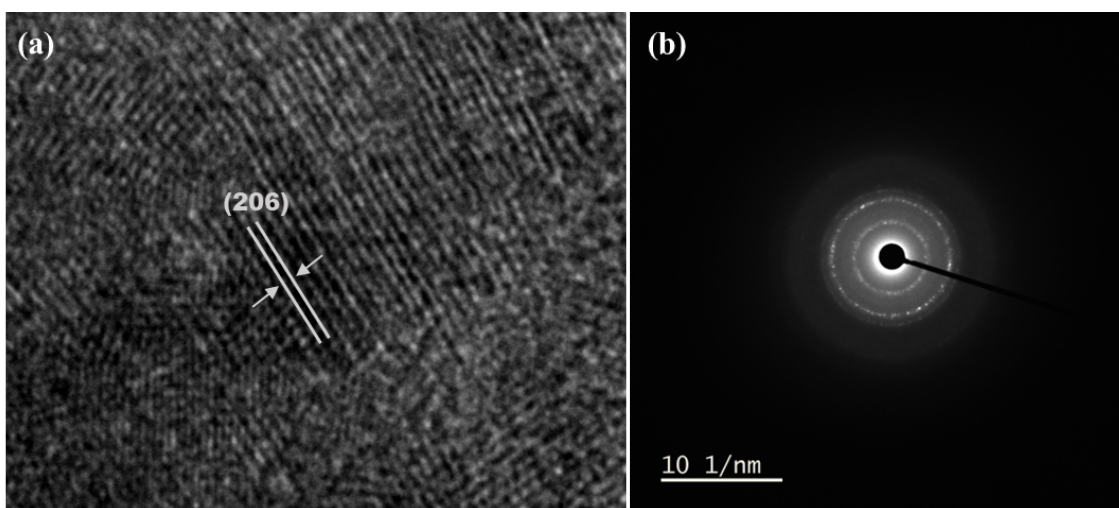

**Figure S15.** HRTEM image showing **(a)** d-spacing and **(b)** SAED pattern of S-QD@MBA\_Blue.

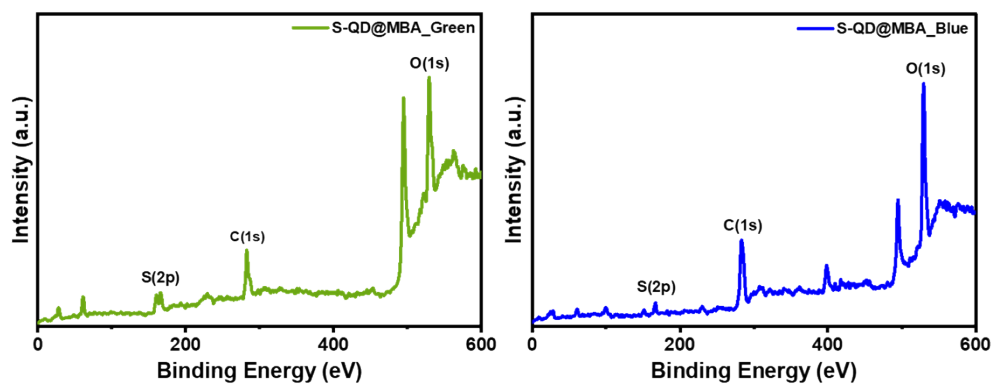

**Figure S16.** XPS Survey spectra of **(a)** S-QD@MBA\_Green and **(b)** S-QD@MBA\_Blue.

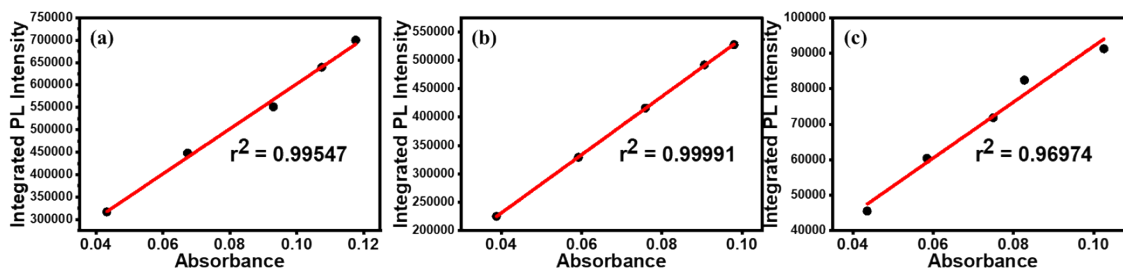

**Figure S17.** Plots of PL intensity of **(a)** Quinine (referenced dye), **(b)** S-QD@MBA\_Blue, and **(c)** S-QD@GSH\_Blue as a function of optical absorbance at 346 nm.

**Table S1.** PL QY calculation S-QD@MBA\_Blue and S-QD@GSH\_Blue.

| Sample Name   | Slope       | PL QY (in %)       |
|---------------|-------------|--------------------|
| Quinine       | 5015334.154 | 55% (reported)     |
| S-QD@MBA_Blue | 5124959.139 | 56.2% (calculated) |
| S-QD@GSH_Blue | 788519.1168 | 8.6% (calculated)  |

**Table S2.** PL lifetimes obtained from exponential fittings of experimental PL decays detected at different wavelengths for S-QD@MBA\_Green and S-QD@MBA\_Blue.

| Sample Name    | Wavelength (nm) | $\tau_1$ (ns) | $A_1$       | $\tau_2$ (ns) | $A_2$       | $\tau_{avg}$ (ns) |
|----------------|-----------------|---------------|-------------|---------------|-------------|-------------------|
| S-QD@MBA_Green | 410             | 1.2141        | 0.557142857 | 10.0972       | 0.442857143 | 5.148044286       |
|                | 450             | 1.1516        | 0.671232877 | 8.5558        | 0.328767123 | 3.585857534       |
|                | 480             | 1.8208        | 0.617647059 | 7.4273        | 0.382352941 | 3.964461765       |
|                | 530             | 2.5083        | 0.734375    | 7.131         | 0.265625    | 3.736204688       |
| S-QD@MBA_Blue  | 410             | 1.0436        | 0.068965517 | 7.8284        | 0.931034483 | 7.360482759       |
|                | 450             | 1.0756        | 0.086206897 | 7.6516        | 0.913793103 | 7.084703448       |
|                | 480             | 1.6446        | 0.285714286 | 7.5408        | 0.714285714 | 5.856171429       |
|                | 530             | 1.9029        | 0.833333333 | 7.5113        | 0.166666667 | 2.837633333       |

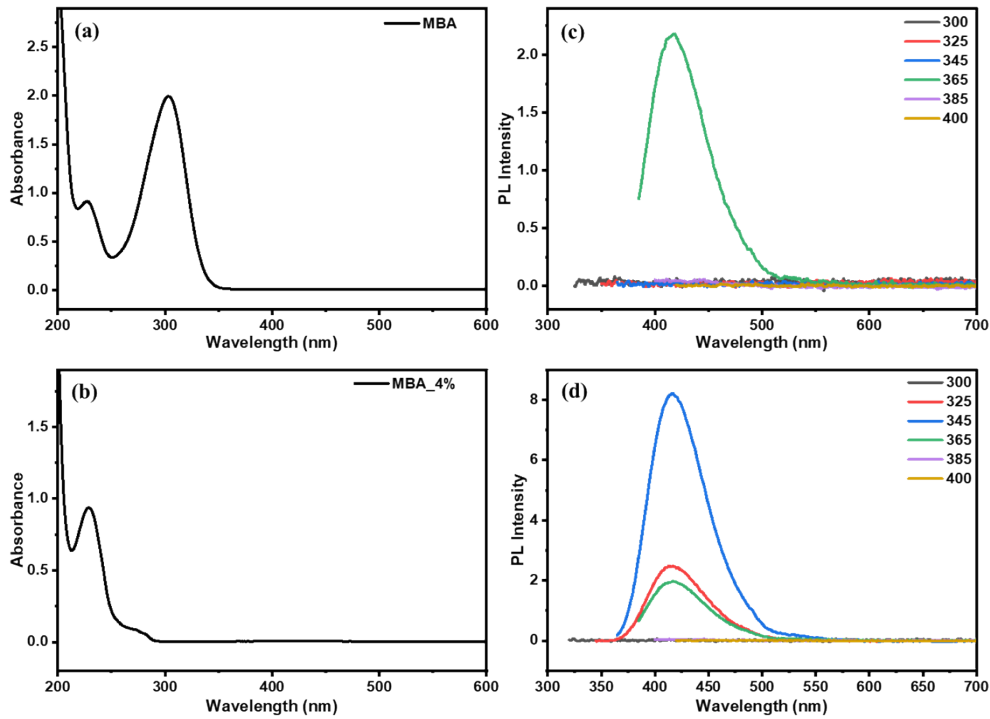

**Figure S18.** UV-vis spectra of (a) MBA and (b) MBA\_4%. PL spectra of (c) MBA (d) MBA\_4% at different excitation wavelengths.

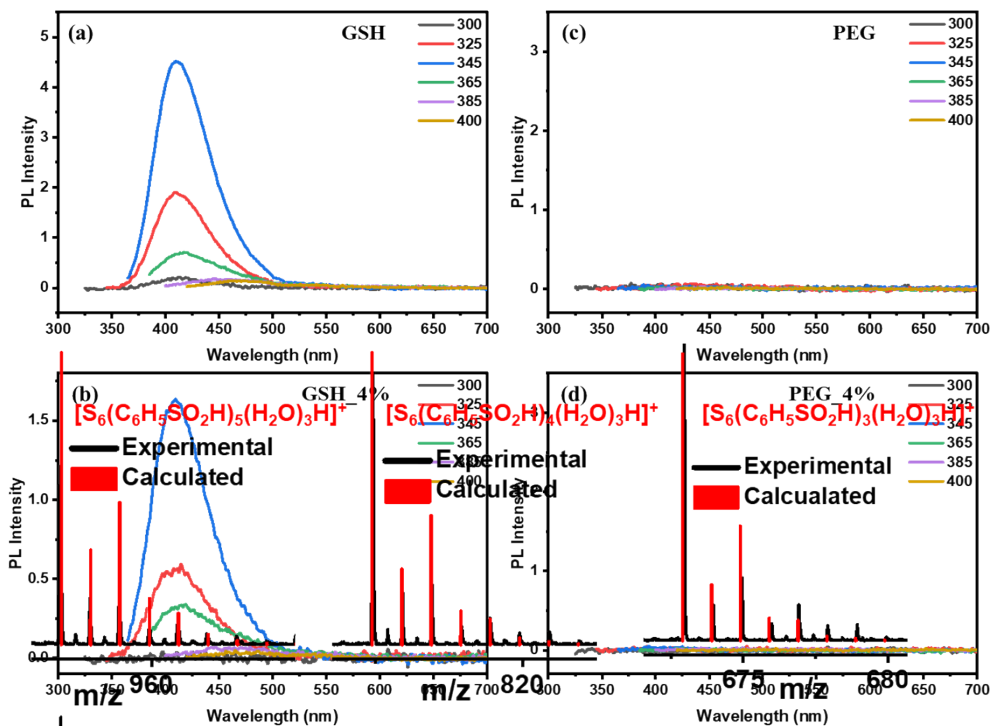

**Figure S19.** PL spectra of (a) GSH (b) GSH\_4% (c) PEG (d) PEG\_4% at different excitation wavelengths.

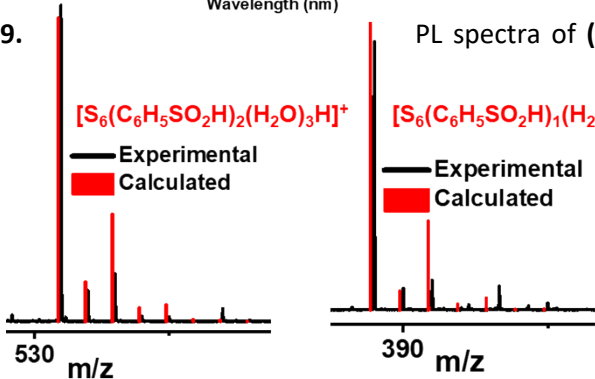

**Figure S20.** ESI MS of  $S_6$  series compared with their theoretically calculated isotope patterns of respective species.

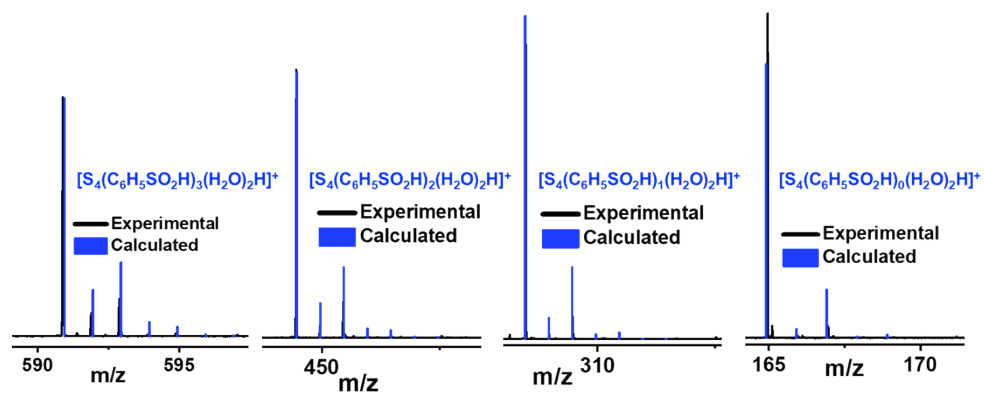

**Figure S21.** ESI MS of  $S_4$  series compared with their theoretically calculated isotope patterns of respective species.

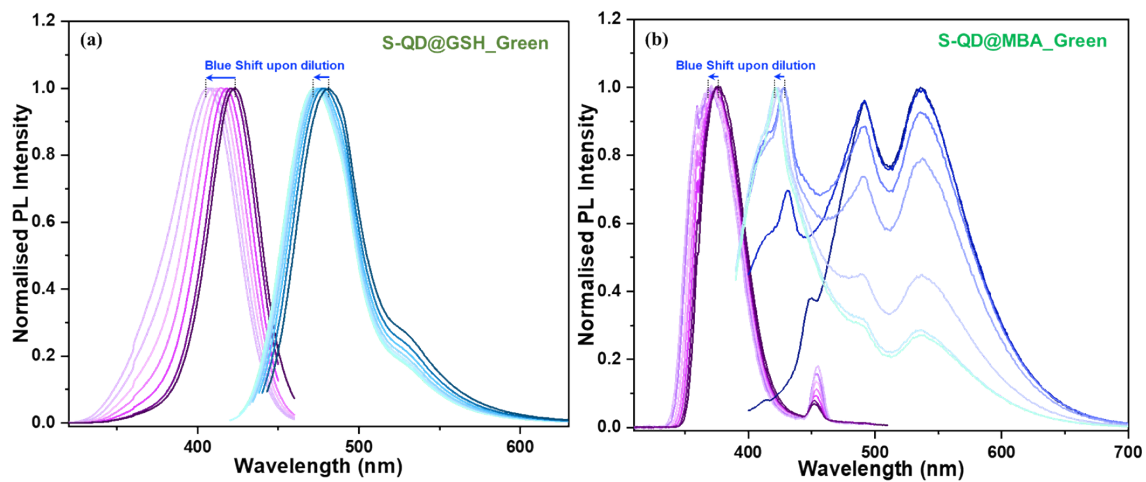



**Figure S22.** Concentration-dependent normalized PL excitation and emission spectra of (a) S-QD@GSH\_Green and (b) S-QD@MBA\_Green.

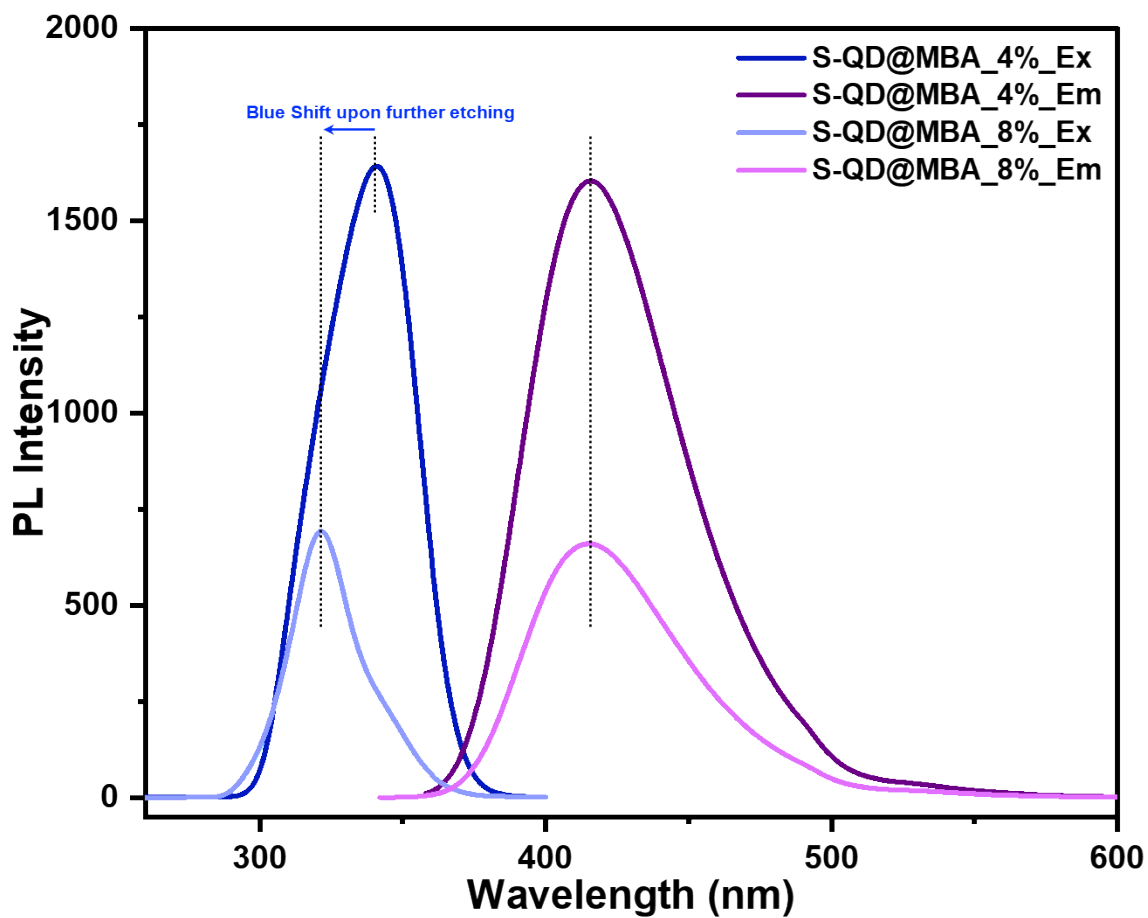

**Figure S23.** PL excitation and emission spectra of S-QD@MBA at 4% and 8% of H<sub>2</sub>O<sub>2</sub> concentration.

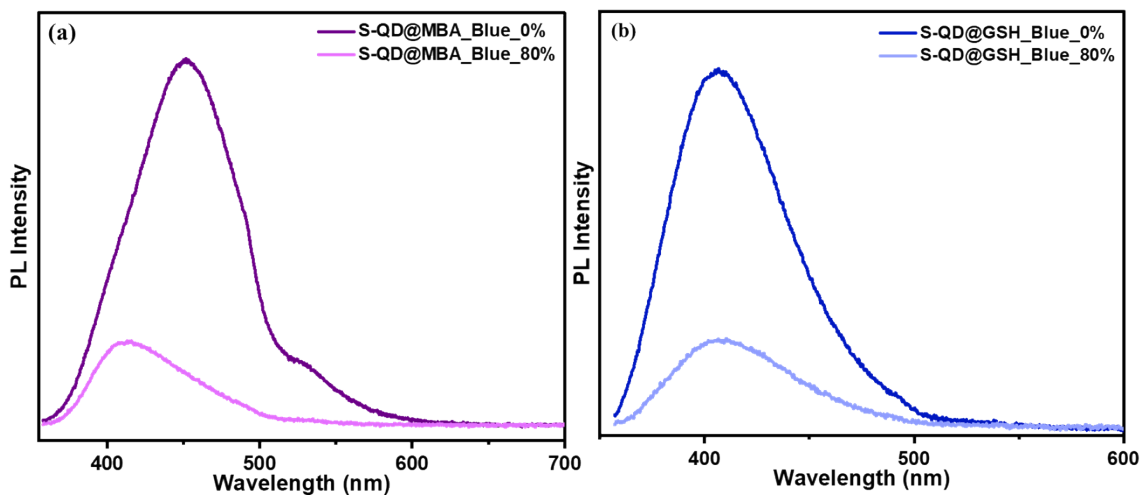

Figure S24. PL Spectra of (a) S-QD@MBA\_Blue and (b) S-QD@GSH\_Blue after treating with 80% ethanol.

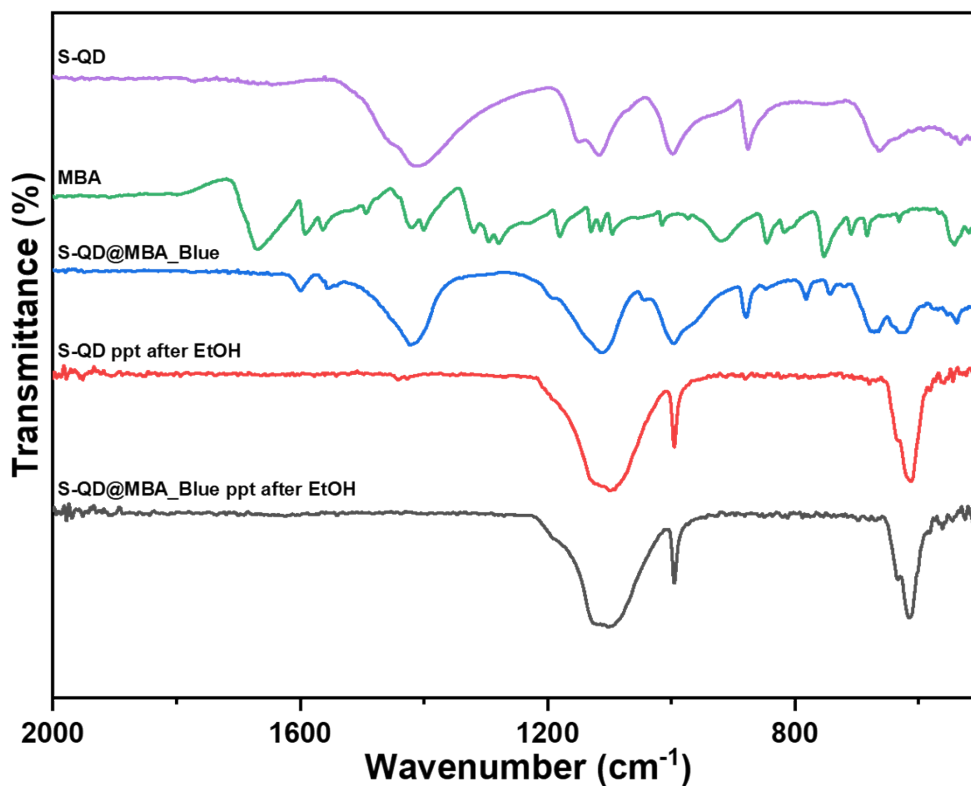

Figure S25. FTIR spectra of solid precipitate obtained after adding ethanol to S-QD@MBA\_Blue (grey line), S-QD (red line) and compared with S-QD@MBA\_Blue (Blue line), MBA ligand (green line) and S-QD (magenta line).

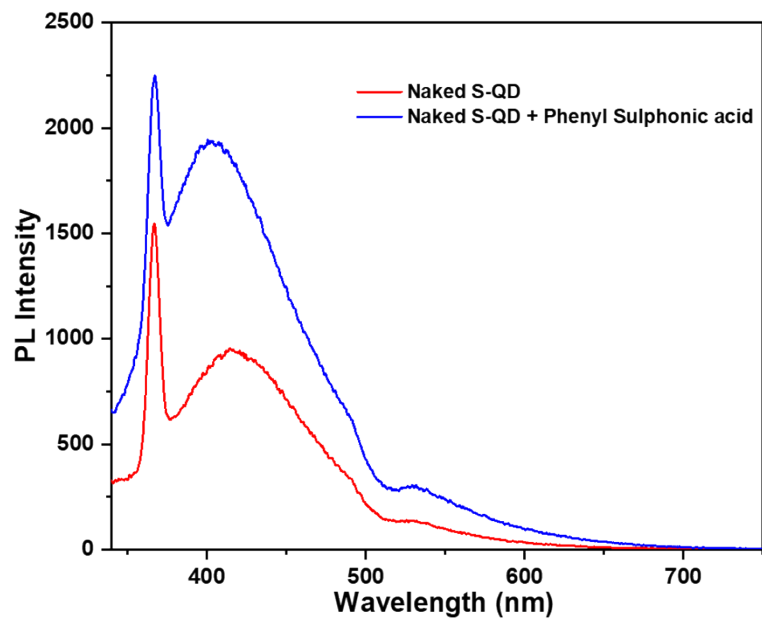

**Figure S26.** PL Spectra of Naked S-QD (red solid line) and naked S-QD + Phenyl Sulphonic Acid (50mM) (blue solid line).
